# Supplementary material for: Targeted sequencing reveals clonal genetic changes in the progression of early lung neoplasms and paired circulating DNA
Source: PubMed Central journal article supplement (PMC4595648; doi:10.1038/ncomms9258), 2015-09-16
Supplement: ncomms9258-s1.pdf [file ncomms9258-s1.pdf]

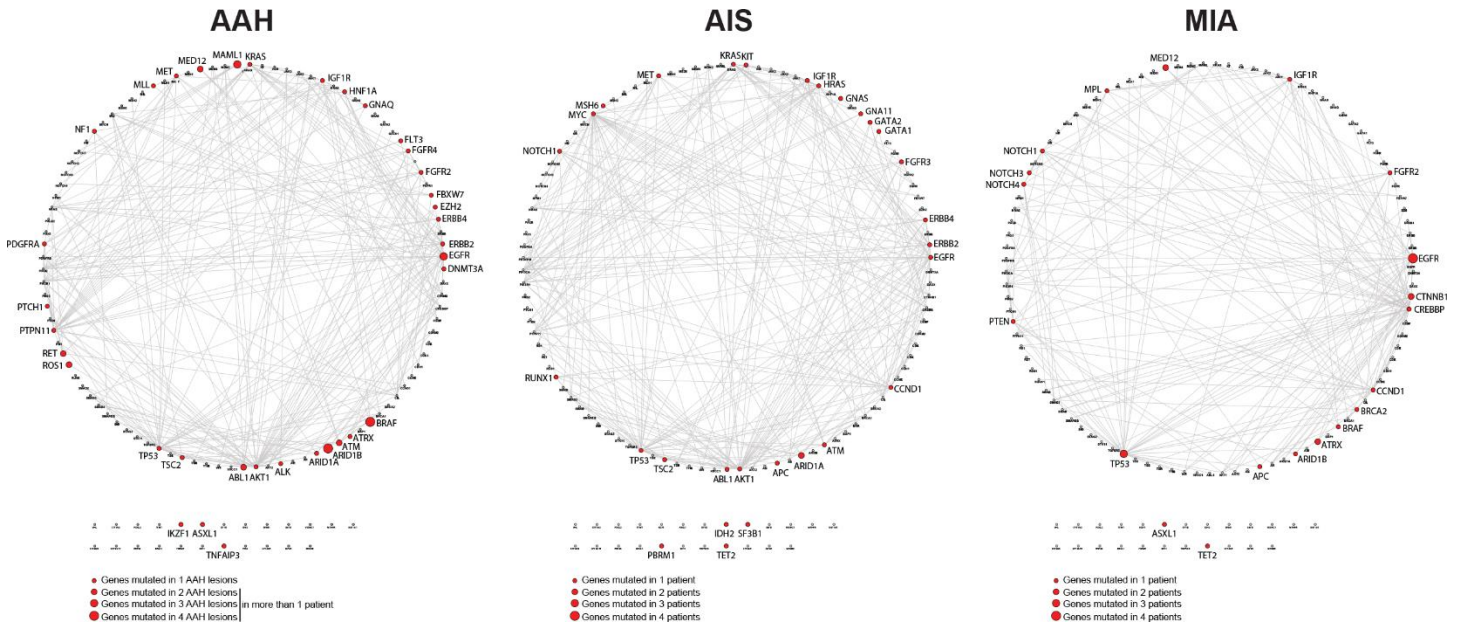

**Supplementary Figure 1.** Cytoscape bioinformatics toolset was used to create the network of protein-protein interactions between the product of each mutated gene and the panel of 125 cancer-driving genes profiled in this study. Red nodes indicate the mutated genes, with node size dependent upon number of mutations found in AAH, AIS and MIA patients.

## Targeted Cancer Gene Analysis

Sequence and copy number analysis for coding regions of 125 well-characterized cancer and pharmacogenomic genes

|        |         |       |        |         |
|--------|---------|-------|--------|---------|
| ABL1   | CYP1A2  | GNAS  | MTHFR  | RNF43   |
| AKT1   | CYP2C19 | HNF1A | MYC    | ROS1    |
| AKT2   | CYP2C9  | HRAS  | MYCN   | RUNX1   |
| ALK    | CYP2D6  | IDH1  | MYD88  | SF3B1   |
| APC    | DAXX    | IDH2  | NF1    | SMAD2   |
| AR     | DNMT3A  | IGF1R | NF2    | SMAD3   |
| ARID1A | DPYD    | IGF2R | NOTCH1 | SMAD4   |
| ARID1B | EGFR    | IKZF1 | NOTCH2 | SMARCB1 |
| ASXL1  | ERBB2   | JAK1  | NOTCH3 | SMO     |
| ATM    | ERBB3   | JAK2  | NOTCH4 | STAG2   |
| ATRX   | ERBB4   | JAK3  | NPM1   | STK11   |
| BAP1   | ERCC1   | KDR   | NRAS   | TET2    |
| BRAF   | EZH2    | KIT   | PALB2  | TGFBR2  |
| BRCA1  | FBXW7   | KRAS  | PAX5   | TNFAIP3 |
| BRCA2  | FGFR1   | MAML1 | PBRM1  | TP53    |
| CBL    | FGFR2   | MDM2  | PDGFRA | TPMT    |
| CCND1  | FGFR3   | MDM4  | PDGFRB | TSC1    |
| CCNE1  | FGFR4   | MED12 | PIK3CA | TSC2    |
| CDH1   | FLT3    | MEN1  | PIK3R1 | TSHR    |
| CDK4   | FOXL2   | MET   | PMS2   | TYMS    |
| CDK6   | G6PD    | MLH1  | PTCH1  | UGT1A1  |
| CDKN2A | GATA1   | MLL   | PTEN   | VHL     |
| CEBPA  | GATA2   | MPL   | PTPN11 | VKORC1  |
| CREBBP | GNA11   | MSH2  | RB1    | WT1     |
| CTNNB1 | GNAQ    | MSH6  | RET    | XRCC1   |

Rearrangement analysis for selected introns of 17 well-characterized cancer genes

|      |      |        |      |         |
|------|------|--------|------|---------|
| ALK  | ETV1 | EWSR1  | RAF1 | TMPRSS2 |
| BCR  | ETV4 | MLL    | RARA |         |
| BRAF | ETV5 | PDGFRA | RET  |         |
| EGFR | ETV6 | PDGFRB | ROS1 |         |

**Supplementary Table 1.** A *CancerSelect* panel for the detection of genetic alterations in 134 well-characterized cancer and pharmacogenomics genes used in this study. Design of the panel incorporates genes of high clinical and biologic importance that are screened using next-generation sequencing at extremely high coverage.

# Atypical Adenomatous Hyperplasia

| Patient # 7337                                     | Normal control | Primary Tumor | AAH-1     | AAH-2      | AAH-3      | AAH-4      |
|----------------------------------------------------|----------------|---------------|-----------|------------|------------|------------|
| Bases in Target Region                             | 603600         | 603600        | 603600    | 603600     | 603600     | 603600     |
| Read Length                                        | 150            | 150           | 150       | 150        | 150        | 150        |
| Bases Sequenced (Filtered)                         | 960023400      | 1159539900    | 822885300 | 1305471600 | 1050767100 | 1388796600 |
| Bases Mapped to Genome (Filtered)                  | 511662600      | 606058500     | 521526300 | 770902050  | 548865300  | 1086099000 |
| Percent Mapped to Genome                           | 53%            | 52%           | 63%       | 59%        | 52%        | 78%        |
| Bases Mapped to ROI                                | 271212622      | 342297432     | 275712281 | 369929281  | 292263025  | 425442135  |
| Percent Mapped to ROI                              | 53%            | 56%           | 53%       | 48%        | 53%        | 39%        |
| Targeted bases with at least 10 reads              | 577445         | 580125        | 579398    | 582830     | 578325     | 589218     |
| Targeted bases with at least 10 reads (%)          | 96%            | 96%           | 96%       | 97%        | 96%        | 98%        |
| Targeted bases with at least 10 distinct reads     | 573212         | 578693        | 577767    | 582482     | 576025     | 589131     |
| Targeted bases with at least 10 distinct reads (%) | 95%            | 96%           | 96%       | 97%        | 95%        | 98%        |
| Average Raw Coverage                               | 449            | 566           | 456       | 611        | 484        | 700        |
| Average High Quality Coverage                      | 441            | 554           | 448       | 600        | 474        | 684        |
| Effective Coverage                                 | 0.98           | 0.98          | 0.98      | 0.98       | 0.98       | 0.98       |
| SNPs in Tumor (>0.4, Cov > 20 in both)             | NA             | 107           | 104       | 102        | 104        | 131        |
| Present in Normal                                  | NA             | 107           | 104       | 102        | 104        | 131        |
| Percent Present in Normal                          | NA             | 100%          | 100%      | 100%       | 100%       | 100%       |

| Patient # 7484                                     | Normal control | Primary Tumor | AAH-1     | AAH-2      | AAH-3      | AAH-4         | AAH-5      |
|----------------------------------------------------|----------------|---------------|-----------|------------|------------|---------------|------------|
| Bases in Target Region                             | 603600         | 603600        | 603600    | 603600     | 603600     | 603600.00     | 603600     |
| Read Length                                        | 150            | 150           | 150       | 150        | 150        | 150.00        | 150        |
| Bases Sequenced (Filtered)                         | 792603300      | 824583600     | 752885400 | 1127735100 | 1059993600 | 1056920400.00 | 1161861600 |
| Bases Mapped to Genome (Filtered)                  | 299846550      | 424737300     | 377686200 | 745119300  | 620253450  | 435232550.00  | 449729400  |
| Percent Mapped to Genome                           | 38%            | 52%           | 50%       | 66%        | 59%        | 41%           | 39%        |
| Bases Mapped to ROI                                | 161493560      | 230286660     | 170911615 | 306366352  | 280518016  | 224836878.00  | 124281827  |
| Percent Mapped to ROI                              | 54%            | 54%           | 45%       | 41%        | 45%        | 52%           | 28%        |
| Targeted bases with at least 10 reads              | 574481         | 576317        | 572362    | 581511     | 579477     | 576591.00     | 572074     |
| Targeted bases with at least 10 reads (%)          | 95%            | 95%           | 95%       | 96%        | 96%        | 96%           | 95%        |
| Targeted bases with at least 10 distinct reads     | 572257         | 575364        | 567427    | 581331     | 578991     | 575677        | 571305     |
| Targeted bases with at least 10 distinct reads (%) | 95%            | 95%           | 94%       | 96%        | 96%        | 95%           | 95%        |
| Average Raw Coverage                               | 268            | 382           | 284       | 506        | 464        | 371           | 206        |
| Average High Quality Coverage                      | 261            | 374           | 276       | 495        | 453        | 362           | 201        |
| Effective Coverage                                 | 0.96           | 0.96          | 0.96      | 0.97       | 0.97       | 0.98          | 0.96       |
| SNPs in Tumor (>0.4, Cov > 20 in both)             | NA             | 122           | 106       | 107        | 109        | 119.00        | 107        |
| Present in Normal                                  | NA             | 122           | 106       | 107        | 109        | 119.00        | 107        |
| Percent Present in Normal                          | NA             | 100%          | 100%      | 100%       | 100%       | 100%          | 100%       |

| Patient # 9911                                     | Normal control | Primary Tumor | AAH-1     | AAH-2     | AAH-3     | AAH-4      |
|----------------------------------------------------|----------------|---------------|-----------|-----------|-----------|------------|
| Bases in Target Region                             | 603600         | 603600        | 603600    | 603600    | 603600    | 603600     |
| Read Length                                        | 150            | 150           | 150       | 150       | 150       | 150        |
| Bases Sequenced (Filtered)                         | 1277204700     | 1032937200    | 964094400 | 856384200 | 869483400 | 1097011200 |
| Bases Mapped to Genome (Filtered)                  | 703444500      | 621909150     | 605961750 | 544226250 | 503424300 | 683383350  |
| Percent Mapped to Genome                           | 55%            | 60%           | 63%       | 64%       | 58%       | 62%        |
| Bases Mapped to ROI                                | 311161700      | 306277843     | 305562028 | 275650036 | 233775066 | 288929883  |
| Percent Mapped to ROI                              | 44%            | 49%           | 50%       | 51%       | 46%       | 42%        |
| Targeted bases with at least 10 reads              | 579576         | 582314        | 580387    | 577884    | 576556    | 579264     |
| Targeted bases with at least 10 reads (%)          | 96%            | 96%           | 96%       | 96%       | 96%       | 96%        |
| Targeted bases with at least 10 distinct reads     | 578523         | 582094        | 579496    | 575775    | 573285    | 578445     |
| Targeted bases with at least 10 distinct reads (%) | 96%            | 96%           | 96%       | 95%       | 95%       | 96%        |
| Average Raw Coverage                               | 513            | 506           | 505       | 455       | 387       | 478        |
| Average High Quality Coverage                      | 501            | 495           | 494       | 445       | 378       | 467        |
| Effective Coverage                                 | 0.97           | 0.97          | 0.97      | 0.97      | 0.96      | 0.97       |
| SNPs in Tumor (>0.4, Cov > 20 in both)             | NA             | 96            | 94        | 104       | 91        | 92         |
| Present in Normal                                  | NA             | 96            | 94        | 104       | 91        | 92         |
| Percent Present in Normal                          | NA             | 100%          | 100%      | 100%      | 100%      | 100%       |

| Patient # 6709                                     | Normal control | Primary Tumor | AAH-1      | AAH-2     | AAH-3     | AAH-4     |
|----------------------------------------------------|----------------|---------------|------------|-----------|-----------|-----------|
| Bases in Target Region                             | 603600         | 603600        | 603600     | 603600    | 603600    | 603600    |
| Read Length                                        | 150            | 150           | 150        | 150       | 150       | 150       |
| Bases Sequenced (Filtered)                         | 1124090100     | 1175856300    | 1019832300 | 967581600 | 890787600 | 707739000 |
| Bases Mapped to Genome (Filtered)                  | 417146700      | 503757300     | 460161900  | 487647750 | 401669550 | 280243200 |
| Percent Mapped to Genome                           | 37%            | 43%           | 45%        | 50%       | 45%       | 40%       |
| Bases Mapped to ROI                                | 213127969      | 257202604     | 228867219  | 233622503 | 209164309 | 151147816 |
| Percent Mapped to ROI                              | 51%            | 51%           | 50%        | 48%       | 52%       | 54%       |
| Targeted bases with at least 10 reads              | 576152         | 576831        | 575950     | 576441    | 575802    | 573221    |
| Targeted bases with at least 10 reads (%)          | 95%            | 96%           | 95%        | 96%       | 95%       | 95%       |
| Targeted bases with at least 10 distinct reads     | 575576         | 576346        | 575302     | 575953    | 575105    | 568963    |
| Targeted bases with at least 10 distinct reads (%) | 95%            | 95%           | 95%        | 95%       | 95%       | 94%       |
| Average Raw Coverage                               | 354            | 426           | 380        | 387       | 347       | 251       |
| Average High Quality Coverage                      | 346            | 416           | 372        | 379       | 339       | 244       |
| Effective Coverage                                 | 0.98           | 0.98          | 0.98       | 0.98      | 0.98      | 0.97      |
| SNPs in Tumor (>0.4, Cov > 20 in both)             | NA             | 116           | 111        | 112       | 113       | 112       |
| Present in Normal                                  | NA             | 116           | 111        | 112       | 113       | 112       |
| Percent Present in Normal                          | NA             | 100%          | 100%       | 100%      | 100%      | 100%      |

| Patient # 4325                                     | Normal control | Primary Tumor | AAH-1      | AAH-2      | AAH-3      | AAH-4     | AAH-5      |
|----------------------------------------------------|----------------|---------------|------------|------------|------------|-----------|------------|
| Bases in Target Region                             | 603600         | 603600        | 603600     | 603600     | 603600     | 603600    | 603600     |
| Read Length                                        | 150            | 150           | 150        | 150        | 150        | 150       | 150        |
| Bases Sequenced (Filtered)                         | 1121971500     | 1188615000    | 1284865500 | 1369085700 | 1200032700 | 903749700 | 1029425100 |
| Bases Mapped to Genome (Filtered)                  | 559258800      | 597056850     | 541425750  | 597324450  | 536677050  | 358960050 | 340215000  |
| Percent Mapped to Genome                           | 50%            | 50%           | 42%        | 44%        | 45%        | 40%       | 33%        |
| Bases Mapped to ROI                                | 264997285      | 278122625     | 283155431  | 322679836  | 269759552  | 184357339 | 168925868  |
| Percent Mapped to ROI                              | 47%            | 47%           | 52%        | 54%        | 50%        | 51%       | 50%        |
| Targeted bases with at least 10 reads              | 577717         | 577656        | 576640     | 576744     | 577708     | 574193    | 573602     |
| Targeted bases with at least 10 reads (%)          | 96%            | 96%           | 96%        | 96%        | 96%        | 95%       | 95%        |
| Targeted bases with at least 10 distinct reads     | 577540         | 577325        | 576187     | 576231     | 576658     | 572753    | 573026     |
| Targeted bases with at least 10 distinct reads (%) | 96%            | 96%           | 95%        | 95%        | 96%        | 95%       | 95%        |
| Average Raw Coverage                               | 439            | 461           | 470        | 535        | 446        | 306       | 280        |
| Average High Quality Coverage                      | 430            | 452           | 457        | 520        | 438        | 299       | 273        |
| Effective Coverage                                 | 0.98           | 0.98          | 0.97       | 0.97       | 0.98       | 0.98      | 0.98       |
| SNPs in Tumor (>0.4, Cov > 20 in both)             | NA             | 93            | 94         | 92         | 94         | 93        | 94         |
| Present in Normal                                  | NA             | 93            | 94         | 92         | 94         | 93        | 94         |
| Percent Present in Normal                          | NA             | 100%          | 100%       | 100%       | 100%       | 100%      | 100%       |

| Patient # 7074                                     | Normal control | Primary Tumor | AAH-1      | AAH-2      | AAH-3     |
|----------------------------------------------------|----------------|---------------|------------|------------|-----------|
| Bases in Target Region                             | 603600         | 603600        | 603600     | 603600     | 603600    |
| Read Length                                        | 150            | 150           | 150        | 150        | 150       |
| Bases Sequenced (Filtered)                         | 1145239200     | 1170512700    | 1246455900 | 1224356400 | 106791700 |
| Bases Mapped to Genome (Filtered)                  | 495477300      | 566299650     | 664005450  | 510648900  | 358480800 |
| Percent Mapped to Genome                           | 43%            | 48%           | 53%        | 42%        | 34%       |
| Bases Mapped to ROI                                | 274811396      | 285286759     | 337458161  | 261862300  | 196440618 |
| Percent Mapped to ROI                              | 55%            | 50%           | 51%        | 51%        | 55%       |
| Targeted bases with at least 10 reads              | 576512         | 576534        | 577667     | 576469     | 574260    |
| Targeted bases with at least 10 reads (%)          | 96%            | 96%           | 96%        | 96%        | 95%       |
| Targeted bases with at least 10 distinct reads     | 575539         | 575910        | 577045     | 575475     | 572771    |
| Targeted bases with at least 10 distinct reads (%) | 95%            | 95%           | 96%        | 95%        | 95%       |
| Average Raw Coverage                               | 456            | 474           | 560        | 435        | 326       |
| Average High Quality Coverage                      | 440            | 460           | 548        | 426        | 318       |
| Effective Coverage                                 | 0.97           | 0.97          | 0.98       | 0.98       | 0.97      |
| SNPs in Tumor (>0.4, Cov > 20 in both)             | NA             | 145           | 129        | 129        | 128       |
| Present in Normal                                  | NA             | 145           | 129        | 129        | 128       |
| Percent Present in Normal                          | NA             | 100%          | 100%       | 100%       | 100%      |

| Normal controls               | AAH  |
|-------------------------------|------|
| Average High Quality Coverage | 403X |
|                               | 415X |

## Supplementary Table 2. Sequencing statistics for AAH samples.

|                      | # of mutations |
|----------------------|----------------|
| Indels               | 4              |
| Splice site          | 2              |
| Nonsense             | 1              |
| Nonsynonymous coding | 48             |
| <b>Total</b>         | <b>55</b>      |

| mutations per lesion |
|----------------------|
| <b>2.2</b>           |

**Supplementary Table 3.** Sequencing analysis of AAH lesions. A. Summary of nonsynonymous mutations and mutation frequency.

| Found in this study |            |               | In COSMIC                         |               |                                        |
|---------------------|------------|---------------|-----------------------------------|---------------|----------------------------------------|
| Gene                | Amino Acid | Type          | Amino Acid                        | Type          | Tissue                                 |
| ALK                 | 311R>H     | Nonsynonymous | 311R>H/L                          | Nonsynonymous | Lung/Brain                             |
| ARID1A              | 1593R>W    | Nonsynonymous | 1593R>L                           | Nonsynonymous | Colon                                  |
| BRAF                | 469G>A     | Nonsynonymous | 469G>A/R/S/L/V/C                  | Nonsynonymous | Lung/Haematopoietic                    |
|                     |            |               |                                   |               | Colon/Skin/Thyroid                     |
|                     |            |               |                                   |               | Cervix/CNS                             |
| BRAF                | 594D>G     | Nonsynonymous | 594D>G/N/H/A/V/E/K                | Nonsynonymous | Lung/Colon/Skin                        |
|                     |            |               | D594_T599del                      | Deletion      | Haematopoietic/CNS                     |
| BRAF                | 601K>E     | Nonsynonymous | 601K>E/I/N/K/L/Q/R                | Nonsynonymous | Lung/Skin/Thyroid/Ovary/Colon/         |
|                     |            |               | K601del                           | Deletion      | Haematopoietic/Urinary tract           |
| EGFR                | 324R>H     | Nonsynonymous | 324R>L                            | Nonsynonymous | CNS                                    |
| ERBB2               | 769D>Y     | Nonsynonymous | 769D>Y/H/N                        | Nonsynonymous | Lung/Stomach                           |
|                     |            |               |                                   |               | Head and neck,<br>Breast/Urinary tract |
| ERBB2               | 777V>L     | Nonsynonymous | 777V>L/MA                         | Nonsynonymous | Lung/Colon/Breast/CNS                  |
|                     |            |               | G776_V777insVC<br>V777_G778insCG  | Insertion     |                                        |
| FBXW7               | 224R>X     | Nonsense      | 224R>X                            | Nonsense      | Lung/Colon/Endometrium                 |
|                     |            |               | 224R>Q                            | Nonsynonymous |                                        |
| FGFR4               | 356R>H     | Nonsynonymous | 356R>H                            | Nonsynonymous | Colon                                  |
| HNF1A               | 179H>N     | Nonsynonymous | H179fs*9                          | Insertion     | Liver                                  |
| KRAS                | 12G>C      | Nonsynonymous | 12G>C/R/N/I/L/Y/E/V/<br>A/W/V/F/S | Nonsynonymous | Lung/Colon/Pancreas                    |
|                     |            |               |                                   |               | Ovary/Biliary tract                    |
| MAML1               | 190R>H     | Nonsynonymous | 190R>H                            | Nonsynonymous | Ovary                                  |
| TP53                | 279G>E     | Nonsynonymous | 279G>R/W                          | Nonsynonymous | Lung/Colon/Urinary tract               |
|                     |            |               | p.P278_G279in                     | Insertion     | Ovary/Head and<br>neck/Breast          |

**Supplementary Table 4.** Sequencing analysis of AAH lesions. List of mutations found in AAH lesions that have been previously described in association with cancer.

| Gene    | % of mutated in lung<br>(by COSMIC) |
|---------|-------------------------------------|
| IKZF1   | 0.1%                                |
| AKT1    | 0.4%                                |
| GNAQ    | 0.6%                                |
| HNF1A   | 1.2%                                |
| ABL1    | 1.3%                                |
| FGFR4   | 1.6%                                |
| MAML1   | 1.7%                                |
| PTPN11  | 1.8%                                |
| FLT3    | 1.8%                                |
| EZH2    | 1.8%                                |
| TNFAIP3 | 1.9%                                |

**Supplementary Table 5.** Sequencing analysis of AAH lesions. Mutations in genes that are rarely implicated in lung adenocarcinoma.

| Most mutated genes |                   |                  |                  |               |
|--------------------|-------------------|------------------|------------------|---------------|
| Gene               | Amino Acid        | # of AAH lesions | % of AAH lesions | # of patients |
| BRAF               | 469G>A            | 4                | 16%              | 4             |
|                    | 594D>G            |                  |                  |               |
|                    | 601K>E            |                  |                  |               |
| ARID1B             | In-frame deletion | 4                | 16%              | 2             |
|                    | 1827R>H           |                  |                  |               |
|                    | 1835A>T           |                  |                  |               |
|                    | 165G>A            |                  |                  |               |
| MAML1              | 190R>H            | 3                | 12%              | 2             |
|                    | 753G>S            |                  |                  |               |
|                    | 982G>V            |                  |                  |               |
| EGFR               | In-frame deletion | 3                | 12%              | 2             |
|                    | 324R>H            |                  |                  |               |
| ABL                | 997P>S            | 2                | 8%               | 2             |
|                    | 608R>C            |                  |                  |               |
| ATM                | Splice site       | 2                | 8%               | 2             |
|                    | 28E>V             |                  |                  |               |
| MED12              | 1253E>Q           | 2                | 8%               | 2             |
|                    | 1212Q>R           |                  |                  |               |
| RET                | 417R>H            | 2                | 8%               | 2             |
|                    | Splice site       |                  |                  |               |
| ROS1               | 1895G>V           | 2                | 8%               | 2             |
|                    | 1601A>D           |                  |                  |               |

**Supplementary Table 6.** Sequencing analysis of AAH lesions. List of most frequently mutated genes among 25 AAH lesions from 6 patients.



## Adenocarcinoma In Situ

| Patient # 9450                                     | Normal control | Zone 1     | Zone 2     | Zone 3     |
|----------------------------------------------------|----------------|------------|------------|------------|
| Bases in Target Region                             | 603600         | 603600     | 603600     | 603600     |
| Read Length                                        | 150            | 150        | 150        | 150        |
| Bases Sequenced (Filtered)                         | 1220679600     | 1192994700 | 1064838000 | 1860708300 |
| Bases Mapped to Genome (filtered)                  | 730832100      | 716853750  | 682192950  | 1205893800 |
| Percent Mapped to Genome                           | 60%            | 60%        | 64%        | 65%        |
| Bases Mapped to ROI                                | 150014720      | 154757726  | 155585151  | 240591144  |
| Percent Mapped to ROI                              | 21%            | 22%        | 23%        | 20%        |
| Targeted bases with at least 10 reads              | 575257         | 576131     | 575555     | 581523     |
| Targeted bases with at least 10 reads (%)          | 95%            | 95%        | 95%        | 96%        |
| Targeted bases with at least 10 distinct reads     | 575165         | 575953     | 575305     | 581373     |
| Targeted bases with at least 10 distinct reads (%) | 95%            | 95%        | 95%        | 96%        |
| Average Raw Coverage                               | 248.7          | 256.4      | 257.7      | 398.2      |
| Average High Quality Coverage                      | 240.4          | 247.5      | 248.8      | 381.0      |
| Effective Coverage                                 | 0.97           | 0.97       | 0.97       | 0.96       |
| SNPs in Tumor (> 0.4, Cov > 20 in both)            | NA             | 96         | 99         | 99         |
| Present in Normal                                  | NA             | 96         | 99         | 99         |
| Percent Present in Normal                          | NA             | 100%       | 100%       | 100%       |

| Patient # 3983                                     | Normal control | Zone 1     | Zone 2    | Zone 3     |
|----------------------------------------------------|----------------|------------|-----------|------------|
| Bases in Target Region                             | 603600         | 603600     | 603600    | 603600     |
| Read Length                                        | 150            | 150        | 150       | 150        |
| Bases Sequenced (Filtered)                         | 1302508500     | 1329149700 | 903294000 | 1405298700 |
| Bases Mapped to Genome (filtered)                  | 669664200      | 578685750  | 455576850 | 591453150  |
| Percent Mapped to Genome                           | 51%            | 44%        | 50%       | 42%        |
| Bases Mapped to ROI                                | 151305270      | 113465224  | 96881665  | 108788771  |
| Percent Mapped to ROI                              | 23%            | 20%        | 21%       | 18%        |
| Targeted bases with at least 10 reads              | 572262         | 566809     | 566433    | 568064     |
| Targeted bases with at least 10 reads (%)          | 95%            | 94%        | 94%       | 94%        |
| Targeted bases with at least 10 distinct reads     | 572072         | 566502     | 565950    | 567963     |
| Targeted bases with at least 10 distinct reads (%) | 95%            | 94%        | 94%       | 94%        |
| Average Raw Coverage                               | 252.4          | 189.3      | 161.6     | 181.3      |
| Average High Quality Coverage                      | 243.6          | 182.4      | 158.3     | 177.6      |
| Effective Coverage                                 | 0.96           | 0.96       | 0.98      | 0.98       |
| SNPs in Tumor (> 0.4, Cov > 20 in both)            | NA             | 125        | 123       | 118        |
| Present in Normal                                  | NA             | 125        | 123       | 118        |
| Percent Present in Normal                          | NA             | 100%       | 100%      | 100%       |

| Patient # 0429                                     | Normal control | Zone 1     | Zone 2     | Zone 3     |
|----------------------------------------------------|----------------|------------|------------|------------|
| Bases in Target Region                             | 603600         | 603600     | 603600     | 603600     |
| Read Length                                        | 150            | 150        | 150        | 150        |
| Bases Sequenced (Filtered)                         | 1584232500     | 1336380000 | 1202961900 | 1560287100 |
| Bases Mapped to Genome (filtered)                  | 847134000      | 816027150  | 691919250  | 790590150  |
| Percent Mapped to Genome                           | 53%            | 61%        | 58%        | 51%        |
| Bases Mapped to ROI                                | 169780657      | 172354217  | 128582669  | 123249785  |
| Percent Mapped to ROI                              | 20%            | 21%        | 19%        | 16%        |
| Targeted bases with at least 10 reads              | 575166         | 575919     | 573234     | 572151     |
| Targeted bases with at least 10 reads (%)          | 95%            | 95%        | 95%        | 95%        |
| Targeted bases with at least 10 distinct reads     | 574972         | 575055     | 573026     | 572077     |
| Targeted bases with at least 10 distinct reads (%) | 95%            | 95%        | 95%        | 95%        |
| Average Raw Coverage                               | 282.1          | 285.6      | 213.6      | 204.9      |
| Average High Quality Coverage                      | 269.2          | 274.3      | 204.0      | 194.8      |
| Effective Coverage                                 | 0.95           | 0.96       | 0.96       | 0.95       |
| SNPs in Tumor (> 0.4, Cov > 20 in both)            | NA             | 107        | 136        | 132        |
| Present in Normal                                  | NA             | 107        | 136        | 132        |
| Percent Present in Normal                          | NA             | 100%       | 100%       | 100%       |

| Patient # 3916                                     | Normal control | Zone 1    | Zone 2     | Zone 3    |
|----------------------------------------------------|----------------|-----------|------------|-----------|
| Bases in Target Region                             | 603600         | 603600    | 603600     | 603600    |
| Read Length                                        | 150            | 150       | 150        | 150       |
| Bases Sequenced (Filtered)                         | 1022771100     | 976716600 | 1161665100 | 988319400 |
| Bases Mapped to Genome (filtered)                  | 389597250      | 530754300 | 515854200  | 211730250 |
| Percent Mapped to Genome                           | 38%            | 54%       | 44%        | 21%       |
| Bases Mapped to ROI                                | 69742038       | 91813472  | 89798773   | 38706527  |
| Percent Mapped to ROI                              | 18%            | 17%       | 17%        | 18%       |
| Targeted bases with at least 10 reads              | 564601         | 567627    | 567612     | 551920    |
| Targeted bases with at least 10 reads (%)          | 94%            | 94%       | 94%        | 91%       |
| Targeted bases with at least 10 distinct reads     | 564395         | 565893    | 567192     | 549591    |
| Targeted bases with at least 10 distinct reads (%) | 94%            | 94%       | 94%        | 91%       |
| Average Raw Coverage                               | 116.4          | 153.3     | 150.0      | 64.8      |
| Average High Quality Coverage                      | 113.9          | 150.1     | 147.6      | 63.5      |
| Effective Coverage                                 | 0.98           | 0.98      | 0.98       | 0.98      |
| SNPs in Tumor (> 0.4, Cov > 20 in both)            | NA             | 99        | 99         | 94        |
| Present in Normal                                  | NA             | 99        | 99         | 94        |
| Percent Present in Normal                          | NA             | 100%      | 100%       | 100%      |

| Patient # 9309                                     | Normal control | Zone 1     | Zone 2     | Zone 3    |
|----------------------------------------------------|----------------|------------|------------|-----------|
| Bases in Target Region                             | 603600         | 603600     | 603600     | 603600    |
| Read Length                                        | 150            | 150        | 150        | 150       |
| Bases Sequenced (Filtered)                         | 1237539900     | 1052806800 | 1186132500 | 843049800 |
| Bases Mapped to Genome (filtered)                  | 1135824300     | 420859950  | 637284600  | 392896650 |
| Percent Mapped to Genome                           | 92%            | 40%        | 54%        | 47%       |
| Bases Mapped to ROI                                | 550368179      | 267671711  | 394970831  | 237215690 |
| Percent Mapped to ROI                              | 48%            | 64%        | 62%        | 60%       |
| Targeted bases with at least 10 reads              | 589033         | 564447     | 575545     | 570398    |
| Targeted bases with at least 10 reads (%)          | 98%            | 94%        | 95%        | 94%       |
| Targeted bases with at least 10 distinct reads     | 588337         | 501366     | 572098     | 557840    |
| Targeted bases with at least 10 distinct reads (%) | 97%            | 83%        | 95%        | 92%       |
| Average Raw Coverage                               | 910            | 439        | 648        | 389       |
| Average High Quality Coverage                      | 880            | 428        | 632        | 380       |
| Effective Coverage                                 | 0.97           | 0.97       | 0.98       | 0.98      |
| SNPs in Tumor (> 0.4, Cov > 20 in both)            | NA             | 77         | 121        | 100       |
| Present in Normal                                  | NA             | 77         | 121        | 100       |
| Percent Present in Normal                          | NA             | 100%       | 100%       | 100%      |

|                               | Normal controls | AIS  |
|-------------------------------|-----------------|------|
| Average High Quality Coverage | 349X            | 258X |

**Supplementary Table 7.** Sequencing statistics for AIS samples.



## Minimally Invasive Adenocarcinoma

| Patient # 2035                                     | Normal control | Zone 1    | Zone 2    | Zone 3    | Zone 4    |
|----------------------------------------------------|----------------|-----------|-----------|-----------|-----------|
| Bases in Target Region                             | 603600         | 603600    | 603600    | 603600    | 603600    |
| Read Length                                        | 150            | 150       | 150       | 150       | 150       |
| Bases Sequenced (Filtered)                         | 736247400      | 627886500 | 578024700 | 782879400 | 748570800 |
| Bases Mapped to Genome (filtered)                  | 320198850      | 270201900 | 277781100 | 402252900 | 359062350 |
| Percent Mapped to Genome                           | 43%            | 43%       | 48%       | 51%       | 48%       |
| Bases Mapped to ROI                                | 165655297      | 151605704 | 143965939 | 202168866 | 185706669 |
| Percent Mapped to ROI                              | 52%            | 56%       | 52%       | 50%       | 52%       |
| Targeted bases with at least 10 reads              | 573251         | 572951    | 571706    | 574730    | 574226    |
| Targeted bases with at least 10 reads (%)          | 95%            | 95%       | 95%       | 95%       | 95%       |
| Targeted bases with at least 10 distinct reads     | 572721         | 570460    | 568706    | 573267    | 573115    |
| Targeted bases with at least 10 distinct reads (%) | 95%            | 95%       | 94%       | 95%       | 95%       |
| Average Raw Coverage                               | 275            | 251       | 238       | 334       | 308       |
| Average High Quality Coverage                      | 272            | 248       | 235       | 324       | 303       |
| Effective Coverage                                 | 0.99           | 0.99      | 0.98      | 0.97      | 0.99      |
| SNPs in Tumor (> 0.4, Cov > 20 in both)            | NA             | 111       | 114       | 117       | 109       |
| Present in Normal                                  | NA             | 111       | 114       | 117       | 109       |
| Percent Present in Normal                          | NA             | 100%      | 100%      | 100%      | 100%      |

| Patient # 1061                                     | Normal control | Zone 1     | Zone 2     | Zone 3     | Zone 4     |
|----------------------------------------------------|----------------|------------|------------|------------|------------|
| Bases in Target Region                             | 603600         | 603600     | 603600     | 603600     | 603600     |
| Read Length                                        | 150            | 150        | 150        | 150        | 150        |
| Bases Sequenced (Filtered)                         | 1266284100     | 1416911700 | 1482048000 | 1293621300 | 1258219200 |
| Bases Mapped to Genome (filtered)                  | 537972300      | 704701800  | 655845300  | 698957550  | 529250100  |
| Percent Mapped to Genome                           | 42%            | 50%        | 44%        | 54%        | 42%        |
| Bases Mapped to ROI                                | 300491220      | 388919161  | 360429489  | 387519316  | 285209827  |
| Percent Mapped to ROI                              | 56%            | 55%        | 55%        | 55%        | 54%        |
| Targeted bases with at least 10 reads              | 577663         | 580150     | 578555     | 579529     | 575847     |
| Targeted bases with at least 10 reads (%)          | 96%            | 96%        | 96%        | 96%        | 95%        |
| Targeted bases with at least 10 distinct reads     | 575915         | 578344     | 574996     | 577927     | 573894     |
| Targeted bases with at least 10 distinct reads (%) | 95%            | 96%        | 95%        | 96%        | 95%        |
| Average Raw Coverage                               | 500            | 643        | 598        | 640        | 473        |
| Average High Quality Coverage                      | 486            | 625        | 581        | 625        | 459        |
| Effective Coverage                                 | 0.97           | 0.97       | 0.97       | 0.98       | 0.97       |
| SNPs in Tumor (> 0.4, Cov > 20 in both)            | NA             | 92         | 97         | 108        | 96         |
| Present in Normal                                  | NA             | 92         | 97         | 108        | 96         |
| Percent Present in Normal                          | NA             | 100%       | 100%       | 100%       | 100%       |

| Patient # 6610                                     | Normal control | Zone 1     | Zone 2     | Zone 3     | Zone 4     |
|----------------------------------------------------|----------------|------------|------------|------------|------------|
| Bases in Target Region                             | 603600         | 603600     | 603600     | 603600     | 603600     |
| Read Length                                        | 150            | 150        | 150        | 150        | 150        |
| Bases Sequenced (Filtered)                         | 1082588700     | 1056920400 | 1052701200 | 1087895400 | 1343589600 |
| Bases Mapped to Genome (filtered)                  | 620848800      | 433523550  | 461219400  | 569649600  | 685253700  |
| Percent Mapped to Genome                           | 57%            | 41%        | 44%        | 52%        | 51%        |
| Bases Mapped to ROI                                | 316416765      | 224836878  | 228814708  | 261469391  | 302795553  |
| Percent Mapped to ROI                              | 51%            | 52%        | 50%        | 46%        | 44%        |
| Targeted bases with at least 10 reads              | 579587         | 576591     | 576912     | 578566     | 578456     |
| Targeted bases with at least 10 reads (%)          | 96%            | 96%        | 96%        | 96%        | 96%        |
| Targeted bases with at least 10 distinct reads     | 579134         | 575677     | 576155     | 577934     | 578261     |
| Targeted bases with at least 10 distinct reads (%) | 96%            | 95%        | 95%        | 96%        | 96%        |
| Average Raw Coverage                               | 524            | 371        | 378        | 432        | 501        |
| Average High Quality Coverage                      | 513            | 362        | 370        | 420        | 489        |
| Effective Coverage                                 | 0.98           | 0.98       | 0.98       | 0.97       | 0.98       |
| SNPs in Tumor (> 0.4, Cov > 20 in both)            | NA             | 119        | 118        | 128        | 121        |
| Present in Normal                                  | NA             | 119        | 118        | 128        | 121        |
| Percent Present in Normal                          | NA             | 100%       | 100%       | 100%       | 100%       |

| Patient # 6992                                     | Normal control | Zone 1    | Zone 2     | Zone 3    | Zone 4    |
|----------------------------------------------------|----------------|-----------|------------|-----------|-----------|
| Bases in Target Region                             | 603600         | 603600    | 603600     | 603600    | 603600    |
| Read Length                                        | 150            | 150       | 150        | 150       | 150       |
| Bases Sequenced (Filtered)                         | 1086844200     | 875968800 | 1114887000 | 723695100 | 949677300 |
| Bases Mapped to Genome (filtered)                  | 656897850      | 502475100 | 821004300  | 459004050 | 541089300 |
| Percent Mapped to Genome                           | 60%            | 57%       | 74%        | 63%       | 57%       |
| Bases Mapped to ROI                                | 341014053      | 279194556 | 418903182  | 206450411 | 249873620 |
| Percent Mapped to ROI                              | 52%            | 56%       | 51%        | 45%       | 46%       |
| Targeted bases with at least 10 reads              | 576826         | 577743    | 584860     | 578385    | 579630    |
| Targeted bases with at least 10 reads (%)          | 96%            | 96%       | 97%        | 96%       | 96%       |
| Targeted bases with at least 10 distinct reads     | 576423         | 570889    | 584248     | 578013    | 579535    |
| Targeted bases with at least 10 distinct reads (%) | 95%            | 95%       | 97%        | 96%       | 96%       |
| Average Raw Coverage                               | 564            | 463       | 691        | 342       | 413       |
| Average High Quality Coverage                      | 552            | 455       | 673        | 336       | 406       |
| Effective Coverage                                 | 0.98           | 0.98      | 0.97       | 0.98      | 0.98      |
| SNPs in Tumor (> 0.4, Cov > 20 in both)            | NA             | 102       | 117        | 126       | 125       |
| Present in Normal                                  | NA             | 102       | 117        | 126       | 125       |
| Percent Present in Normal                          | NA             | 100%      | 100%       | 100%      | 100%      |

| Patient # 4845                                     | Normal control | Zone 1    | Zone 2    | Zone 3    | Zone 4     |
|----------------------------------------------------|----------------|-----------|-----------|-----------|------------|
| Bases in Target Region                             | 603600         | 603600    | 603600    | 603600    | 603600     |
| Read Length                                        | 150            | 150       | 150       | 150       | 150        |
| Bases Sequenced (Filtered)                         | 1012467000     | 900561900 | 839101800 | 946932900 | 1042920600 |
| Bases Mapped to Genome (filtered)                  | 735791700      | 605086800 | 589477350 | 711672450 | 794575800  |
| Percent Mapped to Genome                           | 73%            | 67%       | 70%       | 75%       | 76%        |
| Bases Mapped to ROI                                | 370136749      | 301309780 | 298528212 | 333223400 | 363446038  |
| Percent Mapped to ROI                              | 50%            | 50%       | 51%       | 47%       | 46%        |
| Targeted bases with at least 10 reads              | 583580         | 583042    | 581816    | 589368    | 589045     |
| Targeted bases with at least 10 reads (%)          | 97%            | 97%       | 96%       | 98%       | 98%        |
| Targeted bases with at least 10 distinct reads     | 583450         | 582853    | 581737    | 589190    | 588985     |
| Targeted bases with at least 10 distinct reads (%) | 97%            | 97%       | 96%       | 98%       | 98%        |
| Average Raw Coverage                               | 611            | 496       | 493       | 548       | 598        |
| Average High Quality Coverage                      | 601            | 487       | 484       | 539       | 588        |
| Effective Coverage                                 | 0.98           | 0.98      | 0.98      | 0.98      | 0.98       |
| SNPs in Tumor (> 0.4, Cov > 20 in both)            | N/A            | 98        | 100       | 113       | 116        |
| Present in Normal                                  | N/A            | 98        | 100       | 113       | 116        |
| Percent Present in Normal                          | N/A            | 100%      | 100%      | 100%      | 100%       |

| Normal controls               | MIA  |
|-------------------------------|------|
| Average High Quality Coverage | 485X |
|                               | 450X |

Supplementary Table 8. Sequencing statistics for MIA samples.

|                      | # of unique mutations |           |
|----------------------|-----------------------|-----------|
|                      | AIS                   | MIA       |
| Indels               | 1                     | 4         |
| Splice site          | 3                     | 2         |
| Nonsense             | 0                     | 1         |
| Nonsynonymous coding | 17                    | 23        |
| <b>Total</b>         | <b>21</b>             | <b>30</b> |

**Supplementary Table 9.** Sequencing analysis of AIS and MIA cohorts. Summary of nonsynonymous unique mutations found in both cohorts.

|            | # of mutated genes | # of mutations<br>(all zones) | mutations<br>per zone | mutations<br>per patient |
|------------|--------------------|-------------------------------|-----------------------|--------------------------|
| <b>AIS</b> | 19                 | 31                            | 2.1                   | 6.2                      |
| <b>MIA</b> | 19                 | 54                            | 2.7                   | 10.8                     |

**Supplementary Table 10.** Sequencing analysis of AIS and MIA cohorts. Table demonstrates the number of effected genes, total mutations number and mutations rate per zone and per patient in each group.

| Most mutated genes in AIS |                    |               |       |                                                             |               |
|---------------------------|--------------------|---------------|-------|-------------------------------------------------------------|---------------|
| AIS                       |                    |               | MIA   |                                                             |               |
| Gene                      | Amino Acid         | # of patients | Gene  | Amino Acid                                                  | # of patients |
| ARID1A                    | 1396G>A<br>1528R>Q | 2             | EGFR  | In-frame deletion<br>In-frame insertion<br>790T>M<br>858L>R | 4             |
|                           | TP53               |               |       | 245G>S<br>204E>D<br>154G>V/D                                |               |
|                           |                    |               | ATRX  | 929Q>E<br>183K>E                                            | 2             |
|                           | CTNNB1             |               |       | 535R>Q<br>Splice site                                       |               |
|                           |                    |               | MED12 | 709E>K<br>784R>H                                            | 2             |

**Supplementary Table 11.** Sequencing analysis of AIS and MIA cohorts. Most frequently mutated genes in AIS and MIA tumors.

### Adenocarcinoma In Situ

|                    | 1 | 2 | 3 | 4 | 5 | # of effected patients |
|--------------------|---|---|---|---|---|------------------------|
| EGFR               | ■ |   |   |   |   | 1                      |
| DNA repair network | ■ | ■ | ■ | ■ |   | 4                      |
| WNT                | ■ |   |   |   |   | 1                      |
| TP53               | ■ |   |   |   |   | 1                      |
| NOTCH              | ■ |   |   |   |   | 1                      |

■ Mutation  
 ■ Amplification

### Minimally Invasive Adenocarcinoma

|                    | 1 | 2 | 3 | 4 | 5 | # of effected patients |
|--------------------|---|---|---|---|---|------------------------|
| EGFR               | ■ | ■ | ■ | ■ |   | 4                      |
| DNA repair network | ■ | ■ | ■ | ■ |   | 4                      |
| WNT                | ■ | ■ | ■ | ■ |   | 4                      |
| TP53               | ■ | ■ | ■ |   |   | 3                      |
| NOTCH              | ■ | ■ | ■ |   |   | 3                      |

■ Mutation  
 ■ Amplification

**Supplementary Table 12.** Summary of genes and potentially affected pathways differentially altered in AIS versus MIA tumors.

| Recurrent mutations in MIA |            |               |
|----------------------------|------------|---------------|
| Gene                       | Amino Acid | # of patients |
| EGFR                       | 858L>R     | 2             |
| TP53                       | 154G>V/D   | 2             |

**Supplementary Table 13.** Sequencing analysis of AIS and MIA cohorts. Recurrent mutations in MIA patients.

| <b>Genes mutated in boht: AIS and MIA</b> |
|-------------------------------------------|
|-------------------------------------------|

|       |
|-------|
| APC   |
| CCND1 |
| EGFR  |
| IGF1R |
| TET2  |
| TP53  |

**Supplementary Table 14.** Sequencing analysis of AIS and MIA cohorts. List of genes that found to be mutated in both AIS and MIA patients.



| AIS                 |            |               |                                   |               |                                                                                                                |
|---------------------|------------|---------------|-----------------------------------|---------------|----------------------------------------------------------------------------------------------------------------|
| Found in this study |            |               | In COSMIC                         |               |                                                                                                                |
| Gene                | Amino Acid | Type          | Amino Acid                        | Type          | Tissue                                                                                                         |
| APC                 | 1406Q>H    | Nonsynonymous | 1406Q>H                           | Nonsynonymous | Colon/CNS/Skin                                                                                                 |
|                     |            |               | 1406Q>X                           | Nonsense      |                                                                                                                |
|                     |            |               | Q1406fs*11                        | Insertion     |                                                                                                                |
|                     |            |               | Q1406fs*9                         | Deletion      |                                                                                                                |
| ARID1A              | 1528R>Q    | Nonsynonymous | 1528R>X                           | Nonsense      | Endometrium/Ovary<br>Haematopoietic                                                                            |
| ATM                 | 250R>X     | Nonsense      | 250R>X                            | Nonsense      | Colon/Kidney<br>Endometrium                                                                                    |
| EGFR                | 858L>R     | Nonsynonymous | 858L>R/MK/Q/AG/P/<br>V/W          | Nonsynonymous | Lung/Breast<br>Upper aerodigestive tract                                                                       |
| GNAS                | 232R>C     | Nonsynonymous | 232R>H                            | Nonsynonymous | Endometrium                                                                                                    |
| KRAS                | 12G>C      | Nonsynonymous | 12G>C/R/N/I/L/Y/E/V/<br>A/W/V/F/S | Nonsynonymous | Lung/Colon/Pancreas<br>Ovary/Biliary tract                                                                     |
| MSH6                | 922R>Q     | Nonsynonymous | 922R>Q                            | Nonsynonymous | Colon                                                                                                          |
|                     |            |               | 922R>X                            | Nonsense      |                                                                                                                |
| PBRM1               | 1565W>X    | Nonsynonymous | L1565fs*11                        | Deletion      | Kidney                                                                                                         |
|                     |            |               | L1565fs*>19                       | Insertion     |                                                                                                                |
| PBRM1               | 160E>K     | Nonsense      | 160E>K                            | Nonsense      | Kidney                                                                                                         |
| SF3B1               | 700K>E     | Nonsynonymous | 700K>E                            | Nonsynonymous | Haematopoietic<br>CNS/Breast/Pancreas                                                                          |
| TSC2                | 354Q>R     | Nonsynonymous | 354Q>H                            | Nonsynonymous | Lung                                                                                                           |
| MIA                 |            |               |                                   |               |                                                                                                                |
| Found in this study |            |               | In COSMIC                         |               |                                                                                                                |
| Gene                | Amino Acid | Type          | Amino Acid                        | Type          | Tissue                                                                                                         |
| APC                 | 1444Q>R    | Nonsynonymous | 1444Q>R/P                         | Nonsynonymous | Colon/Pancreas/                                                                                                |
|                     |            |               | 1444Q>X                           | Nonsense      |                                                                                                                |
|                     |            |               | Q1444fs*29                        | Deletion      |                                                                                                                |
| BRAF                | 581N>S     | Nonsynonymous | 581N>S/T/I/Y                      | Nonsynonymous | Lung/Colon/Ovary/Skin                                                                                          |
| CTNNB1              | 535R>Q     | Nonsynonymous | 535R>Q                            | Nonsynonymous | Endometrium                                                                                                    |
| EGFR                | 858L>R     | Nonsynonymous | 858L>R/MK/Q/AG/P/<br>V/W          | Nonsynonymous | Lung/Breast<br>Upper aerodigestive tract                                                                       |
| EGFR                | 790T>M     | Nonsynonymous | 790T>M/A                          | Nonsynonymous | Lung<br>Oesophagus                                                                                             |
| MED12               | 784R>H     | Nonsynonymous | 784R>H                            | Nonsynonymous | Haematopoietic                                                                                                 |
| NOTCH3              | 1700D>Y    | Nonsynonymous | 1700D>Y                           | Nonsynonymous | Lung                                                                                                           |
| PTEN                | 301D>N     | Nonsynonymous | D301fs*6                          | Deletion      | Endometrium                                                                                                    |
| TP53                | 245G>S     | Nonsynonymous | 245G>S/R                          | Nonsynonymous | Colon/Breast/Ovary/Liver/<br>Urinary tract/<br>CNS/Pancreas                                                    |
|                     |            |               | G245deG                           | Deletion      |                                                                                                                |
|                     |            |               | G245fs*17                         | Deletion      |                                                                                                                |
|                     |            |               | G245fs*14                         | Deletion      |                                                                                                                |
| TP53                | 154G>V     | Nonsynonymous | 154G>S/C/I/D/AV                   | Nonsynonymous | Lung/Cervix/Colon/<br>Adrenal<br>gland/Skin/Upper<br>aerodigestive<br>tract/Pancreas/Liver/<br>Breast/Prostate |
|                     |            |               | G154fs*14                         | Deletion      |                                                                                                                |
|                     |            |               | G154fs*16                         | Deletion      |                                                                                                                |
|                     |            |               | p.G154fs*22                       | Deletion      |                                                                                                                |
|                     |            |               | G154_R156deGTR                    | Deletion      |                                                                                                                |
| G154fs*27           | Insertion  |               |                                   |               |                                                                                                                |

**Supplementary Table 15.** Sequencing analysis of AIS and MIA cohorts. List of mutations found in either AIS or MIA patients that have been previously observed in solid tumors (including lung) and hematopoietic malignancies.

| <b>AIS</b>   |                                         |
|--------------|-----------------------------------------|
| <b>Gene</b>  | <b>% of mutated in lung (by COSMIC)</b> |
| <b>ABL1</b>  | <b>1.3%</b>                             |
| <b>CCND1</b> | <b>0.7%</b>                             |
| <b>GATA1</b> | <b>1.2%</b>                             |
| <b>GNAS</b>  | <b>1.2%</b>                             |
| <b>KIT</b>   | <b>1.5%</b>                             |
| <b>TET2</b>  | <b>1.7%</b>                             |
| <b>MIA</b>   |                                         |
| <b>Gene</b>  | <b>% of mutated in lung (by COSMIC)</b> |
| <b>CCND1</b> | <b>0.7%</b>                             |
| <b>MPL</b>   | <b>1.0%</b>                             |
| <b>TET2</b>  | <b>1.7%</b>                             |

**Supplementary Table 16.** Sequencing analysis of AIS and MIA cohorts. Mutations in genes that are rarely implicated in lung adenocarcinoma.

| <b>Patient ID</b> | <b>Age</b> | <b>Race</b>          | <b>Gender</b> | <b>Hispanic or Latino (Y/N)</b> | <b>Smoking history</b> |
|-------------------|------------|----------------------|---------------|---------------------------------|------------------------|
| <b>9450</b>       | 64         | White                | Male          | No                              | Yes                    |
| <b>3983</b>       | 72         | Black                | Female        | No                              | No                     |
| <b>0429</b>       | 84         | White                | Female        | No                              | Yes                    |
| <b>3916</b>       | 70         | White                | Male          | No                              | No                     |
| <b>9309</b>       | 45         | Black                | Female        | No                              | No                     |
| <b>2035</b>       | 41         | White                | Female        | No                              | No                     |
| <b>1061</b>       | 73         | White                | Male          | No                              | Yes                    |
| <b>6610</b>       | 71         | Black                | Male          | No                              | Yes                    |
| <b>6992</b>       | 61         | White                | Female        | No                              | Yes                    |
| <b>4845</b>       | 73         | White                | Male          | No                              | Yes                    |
| <b>7074</b>       | 68         | asian                | Male          | No                              | Yes                    |
| <b>4325</b>       | 62         | White                | Female        | No                              | Yes                    |
| <b>6709</b>       | 62         | White                | Female        | No                              | Yes                    |
| <b>9911</b>       | 74         | White                | Female        | No                              | Yes                    |
| <b>7484</b>       | 64         | White                | Male          | No                              | No                     |
| <b>7337</b>       | 76         | OTHER - from Bermuda | Male          | No                              | Yes                    |

**Supplementary Table 17.** Socio-demographic data of patients used in this study. Patient's race and ethnicity data, age and smoking history.

## Atypical Adenomatous Hyperplasia

### Patient # 7337

| Specimen ID | Histologic samples within the same lesion | Sample type                      | Stage* |
|-------------|-------------------------------------------|----------------------------------|--------|
| 54560       | AAH-1                                     | Atypical Adenomatous Hyperplasia |        |
| 54561       | AAH-2                                     |                                  |        |
| 54562       | AAH-3                                     |                                  |        |
| 54563       | AAH-4                                     |                                  |        |
| 54564       | Primary Tumor                             | Adenocarcinoma                   | T1N0MX |
| 54565       | Lymph Node                                |                                  |        |

### Patient # 7484

| Specimen ID | Histologic samples within the same lesion | Sample type                      | Stage* |
|-------------|-------------------------------------------|----------------------------------|--------|
| 54555       | AAH-1                                     | Atypical Adenomatous Hyperplasia |        |
| 54672       | AAH-2                                     |                                  |        |
| 54557       | AAH-3                                     |                                  |        |
| 54554       | AAH-4                                     |                                  |        |
| 54556       | AAH-5                                     |                                  |        |
| 54558       | Primary Tumor                             | Adenocarcinoma                   | T4N2M0 |
| 54559       | Lymph Node                                |                                  |        |

### Patient # 9911

| Specimen ID | Histologic samples within the same lesion | Sample type                      | Stage* |
|-------------|-------------------------------------------|----------------------------------|--------|
| 54548       | AAH-1                                     | Atypical Adenomatous Hyperplasia |        |
| 54550       | AAH-2                                     |                                  |        |
| 54551       | AAH-3                                     |                                  |        |
| 54552       | AAH-4                                     |                                  |        |
| 54553       | Primary Tumor                             | Adenocarcinoma                   | T1N0M0 |
| 54549       | Normal Lung                               |                                  |        |

### Patient # 6709

| Specimen ID | Histologic samples within the same lesion | Sample type                      | Stage* |
|-------------|-------------------------------------------|----------------------------------|--------|
| 54542       | AAH-1                                     | Atypical Adenomatous Hyperplasia |        |
| 54543       | AAH-2                                     |                                  |        |
| 54544       | AAH-3                                     |                                  |        |
| 54545       | AAH-4                                     |                                  |        |
| 54546       | Primary Tumor                             | Adenocarcinoma                   | T2N0M0 |
| 54547       | Lymph Node                                |                                  |        |

### Patient # 4325

| Specimen ID | Histologic samples within the same lesion | Sample type                      | Stage* |
|-------------|-------------------------------------------|----------------------------------|--------|
| 54535       | AAH-1                                     | Atypical Adenomatous Hyperplasia |        |
| 54537       | AAH-2                                     |                                  |        |
| 54538       | AAH-3                                     |                                  |        |
| 54539       | AAH-4                                     |                                  |        |
| 54540       | AAH-5                                     |                                  |        |
| 54536       | Primary Tumor                             | Adenocarcinoma                   | T1N0M0 |
| 54541       | Lymph node                                |                                  |        |

### Patient # 7074

| Specimen ID | Histologic samples within the same lesion | Sample type                      | Stage* |
|-------------|-------------------------------------------|----------------------------------|--------|
| 54520       | AAH-1                                     | Atypical Adenomatous Hyperplasia |        |
| 54522       | AAH-2                                     |                                  |        |
| 54524       | AAH-3                                     |                                  |        |
| 54532       | Primary Tumor                             | Adenocarcinoma                   | T2N0M0 |
| 54533       | Lymph node                                |                                  |        |

\*For the AAHs, the provided staging information is for the corresponding invasive lung adenocarcinomas

**Supplementary Table 18.** List of AAH samples collected for this study and histopathological diagnostics.

## Adenocarcinoma in Situ

### Patient # 9450

| Specimen ID  | Histologic progression within the same lesion | Tumor type                        | Histopathologic Diagnosis | Stage   |
|--------------|-----------------------------------------------|-----------------------------------|---------------------------|---------|
| 50833        | Tumor Zone 1                                  | Bronchioloalveolar adenocarcinoma | Adenocarcinoma in Situ    | TisN0M0 |
| 50835        | Tumor Zone 2                                  |                                   |                           |         |
| 50836        | Tumor Zone 3                                  |                                   |                           |         |
| <b>50834</b> | <b>Control Lymph node</b>                     |                                   |                           |         |

### Patient # 3983

| Sample number | Histologic progression within the same lesion | Tumor type                        | Histopathologic Diagnosis | Stage   |
|---------------|-----------------------------------------------|-----------------------------------|---------------------------|---------|
| 50838         | Tumor Zone 1                                  | Bronchioloalveolar adenocarcinoma | Adenocarcinoma in Situ    | TisN0M0 |
| 50841         | Tumor Zone 2                                  |                                   |                           |         |
| 50842         | Tumor Zone 3                                  |                                   |                           |         |
| <b>50837</b>  | <b>Control Lymph node</b>                     |                                   |                           |         |

### Patient # 0429

| Sample number | Histologic progression within the same lesion | Tumor type                        | Histopathologic Diagnosis | Stage   |
|---------------|-----------------------------------------------|-----------------------------------|---------------------------|---------|
| 50951         | Tumor Zone 1                                  | Bronchioloalveolar adenocarcinoma | Adenocarcinoma in Situ    | TisN0M0 |
| 50952         | Tumor Zone 2                                  |                                   |                           |         |
| 50953         | Tumor Zone 3                                  |                                   |                           |         |
| <b>50950</b>  | <b>Control Lymph node</b>                     |                                   |                           |         |

### Patient # 3916

| Sample number | Histologic progression within the same lesion | Tumor type                        | Histopathologic Diagnosis | Stage   |
|---------------|-----------------------------------------------|-----------------------------------|---------------------------|---------|
| 50954         | Tumor Zone 1                                  | Bronchioloalveolar adenocarcinoma | Adenocarcinoma in Situ    | TisN0M0 |
| 50955         | Tumor Zone 2                                  |                                   |                           |         |
| 50956         | Tumor Zone 3                                  |                                   |                           |         |
| <b>50997</b>  | <b>Control Lymph node</b>                     |                                   |                           |         |

### Patient # 9309

| Sample number | Histologic progression within the same lesion | Tumor type                        | Histopathologic Diagnosis | Stage   |
|---------------|-----------------------------------------------|-----------------------------------|---------------------------|---------|
| 52274         | Tumor Zone 1                                  | Bronchioloalveolar adenocarcinoma | Adenocarcinoma in Situ    | TisN0M0 |
| 52275         | Tumor Zone 2                                  |                                   |                           |         |
| 52276         | Tumor Zone 3                                  |                                   |                           |         |
| <b>52277</b>  | <b>Control Lymph node</b>                     |                                   |                           |         |

**Supplementary Table 19.** List of AIS samples collected for this study and histopathological diagnostics.

## Minimally invasive adenocarcinoma

### Patient # 2035

| Specimen ID  | Histologic progression within the same lesion | Tumor type                        | Histopathologic Diagnosis         | Stage  |
|--------------|-----------------------------------------------|-----------------------------------|-----------------------------------|--------|
| 52283        | Tumor Zone 1                                  | Bronchioloalveolar adenocarcinoma | Minimally invasive adenocarcinoma | T1N0M0 |
| 52284        | Tumor Zone 2                                  |                                   |                                   |        |
| 52285        | Tumor Zone 3                                  |                                   |                                   |        |
| 52286        | Tumor Zone 4                                  |                                   |                                   |        |
| <b>52292</b> | <b>Control Lymph node</b>                     |                                   |                                   |        |

### Patient # 1061

| Specimen ID  | Histologic progression within the same lesion | Tumor type                        | Histopathologic Diagnosis         | Stage  |
|--------------|-----------------------------------------------|-----------------------------------|-----------------------------------|--------|
| 52287        | Tumor Zone 1                                  | Bronchioloalveolar adenocarcinoma | Minimally invasive adenocarcinoma | T1N0M0 |
| 52288        | Tumor Zone 2                                  |                                   |                                   |        |
| 52289        | Tumor Zone 3                                  |                                   |                                   |        |
| 52290        | Tumor Zone 4                                  |                                   |                                   |        |
| <b>52291</b> | <b>Control Lymph node</b>                     |                                   |                                   |        |

### Patient # 4845

| Specimen ID  | Histologic progression within the same lesion | Tumor type                        | Histopathologic Diagnosis         | Stage  |
|--------------|-----------------------------------------------|-----------------------------------|-----------------------------------|--------|
| 53590        | Tumor Zone 1                                  | Bronchioloalveolar adenocarcinoma | Minimally invasive adenocarcinoma | T1N0M0 |
| 53591        | Tumor Zone 2                                  |                                   |                                   |        |
| 53592        | Tumor Zone 3                                  |                                   |                                   |        |
| 53593        | Tumor Zone 4                                  |                                   |                                   |        |
| <b>53594</b> | <b>Control Lymph node</b>                     |                                   |                                   |        |

### Patient # 6992

| Specimen ID  | Histologic progression within the same lesion | Tumor type                        | Histopathologic Diagnosis         | Stage  |
|--------------|-----------------------------------------------|-----------------------------------|-----------------------------------|--------|
| 52600        | Tumor Zone 1                                  | Bronchioloalveolar adenocarcinoma | Minimally invasive adenocarcinoma | T1N0M0 |
| 52601        | Tumor Zone 2                                  |                                   |                                   |        |
| 52602        | Tumor Zone 3                                  |                                   |                                   |        |
| 52603        | Tumor Zone 4                                  |                                   |                                   |        |
| <b>52604</b> | <b>Control Lymph node</b>                     |                                   |                                   |        |

### Patient # 6610

| Specimen ID  | Histologic progression within the same lesion | Tumor type                        | Histopathologic Diagnosis         | Stage  |
|--------------|-----------------------------------------------|-----------------------------------|-----------------------------------|--------|
| 52589        | Tumor Zone 1                                  | Bronchioloalveolar adenocarcinoma | Minimally invasive adenocarcinoma | T1N0M0 |
| 52590        | Tumor Zone 2                                  |                                   |                                   |        |
| 52597        | Tumor Zone 3                                  |                                   |                                   |        |
| 52599        | Tumor Zone 4                                  |                                   |                                   |        |
| <b>52586</b> | <b>Control Lymph node</b>                     |                                   |                                   |        |

**Supplementary Table 20.** List of MIA samples collected for this study and histopathological diagnostics.

## Atypical Adenomatous Hyperplasia

Patient # 7337

| Histologic samples within the same lesion | Gene   | Mutation Type | Consequence          | Amino Acid (protein) | Mutant reads | Distinct Total Reads | Distinct Mutant Reads |
|-------------------------------------------|--------|---------------|----------------------|----------------------|--------------|----------------------|-----------------------|
| AAH-1                                     | ALK    | Substitution  | Nonsynonymous coding | 311R>H               | 4%           | 250                  | 10                    |
|                                           | ARID1B | Deletion      | In-frame deletion    | NA                   | 3%           | 590                  | 17                    |
|                                           | EP302  | Substitution  | Nonsynonymous coding | 185D>H               | 3%           | 276                  | 7                     |
|                                           | IGF1R  | Substitution  | Nonsynonymous coding | 895R>W               | 3%           | 506                  | 15                    |
|                                           | MAML1  | Substitution  | Nonsynonymous coding | 190R>H               | 6%           | 367                  | 21                    |
| AAH-2                                     | MAML1  | Substitution  | Nonsynonymous coding | 753G>S               | 3%           | 382                  | 12                    |
|                                           | PTCH1  | Substitution  | Nonsynonymous coding | 1122M>K              | 4%           | 314                  | 12                    |
| AAH-3                                     | BRAF   | Substitution  | Nonsynonymous coding | 601K>E               | 2%           | 563                  | 12                    |
| AAH-4                                     | EGFR   | Deletion      | In-frame deletion    | NA                   | 2%           | 457                  | 7                     |
|                                           | TP53   | Substitution  | Nonsynonymous coding | 279G>E               | 3%           | 225                  | 6                     |
| Primary Tumor                             | ARID1B | Substitution  | Nonsynonymous coding | 1827R>H              | 2%           | 720                  | 15                    |
|                                           | EGFR   | Deletion      | In-frame deletion    | NA                   | 2%           | 290                  | 6                     |
|                                           | TP53   | Substitution  | Nonsynonymous coding | 279G>E               | 17%          | 766                  | 128                   |
| Primary Tumor                             | EGFR   | Deletion      | In-frame deletion    | NA                   | 9%           | 882                  | 80                    |
|                                           | TP53   | Substitution  | Nonsynonymous coding | 279G>E               | 20%          | 593                  | 117                   |

Patient # 7484

| Histologic samples within the same lesion | Gene  | Mutation Type | Consequence                           | Amino Acid (protein) | Mutant reads | Distinct Total Reads | Distinct Mutant Reads |
|-------------------------------------------|-------|---------------|---------------------------------------|----------------------|--------------|----------------------|-----------------------|
| AAH-1                                     |       |               | No somatic sequence alterations found |                      |              |                      |                       |
| AAH-2                                     |       |               | No somatic sequence alterations found |                      |              |                      |                       |
| AAH-3                                     | BRAF  | Substitution  | Nonsynonymous coding                  | 469G>A               | 3%           | 316                  | 10                    |
| AAH-4                                     |       |               | No somatic sequence alterations found |                      |              |                      |                       |
| AAH-5                                     |       |               | No somatic sequence alterations found |                      |              |                      |                       |
| Primary Tumor                             | ATM   | Substitution  | Nonsynonymous coding                  | 2455L>M              | 35%          | 140                  | 49                    |
|                                           | ATRX  | Substitution  | Nonsynonymous coding                  | 929Q>E               | 4%           | 112                  | 4                     |
|                                           | BRAF  | Substitution  | Nonsynonymous coding                  | 466G>V               | 20%          | 176                  | 35                    |
|                                           | ERBB2 | Substitution  | Nonsynonymous coding                  | 243G>S               | 25%          | 399                  | 101                   |
|                                           | IKZF1 | Substitution  | Nonsynonymous coding                  | 210Y>C               | 22%          | 246                  | 54                    |
|                                           | NRAS  | Substitution  | Nonsynonymous coding                  | 13G>R                | 20%          | 490                  | 100                   |
|                                           | STK11 | Substitution  | Splice site donor                     | NA                   | 41%          | 230                  | 94                    |

Patient # 7484

| Gene   | Folds | Amplification/Deletion |
|--------|-------|------------------------|
| MET    | 3.1   | Amplification          |
| CDKN2A | NA    | Deletion               |

Patient # 9911

| Histologic samples within the same lesion | Gene  | Mutation Type | Consequence          | Amino Acid (protein) | Mutant reads | Distinct Total Reads | Distinct Mutant Reads |
|-------------------------------------------|-------|---------------|----------------------|----------------------|--------------|----------------------|-----------------------|
| AAH-1                                     | BRAF  | Substitution  | Nonsynonymous coding | 594D>G               | 9%           | 333                  | 29                    |
|                                           | ROS1  | Substitution  | Nonsynonymous coding | 1895G>V              | 10%          | 544                  | 56                    |
| AAH2                                      | ERBB2 | Substitution  | Nonsynonymous coding | 769D>Y               | 2%           | 259                  | 6                     |
|                                           | ERBB2 | Substitution  | Nonsynonymous coding | 777V>L               | 3%           | 252                  | 8                     |
|                                           | ERBB4 | Substitution  | Nonsynonymous coding | 210R>K               | 5%           | 251                  | 12                    |
|                                           | HNF1A | Substitution  | Nonsynonymous coding | 179H>N               | 5%           | 240                  | 12                    |
|                                           | KRAS  | Substitution  | Nonsynonymous coding | 12G>C                | 6%           | 252                  | 16                    |
| AAH-3                                     | MAML1 | Substitution  | Nonsynonymous coding | 159R>H               | 10%          | 274                  | 28                    |
|                                           | KRAS  | Substitution  | Nonsynonymous coding | 12G>C                | 8%           | 197                  | 15                    |
|                                           | MAML1 | Substitution  | Nonsynonymous coding | 982G>V               | 8%           | 48                   | 4                     |
| AAH-4                                     | MLL   | Substitution  | Nonsynonymous coding | 723S>Y               | 4%           | 130                  | 5                     |
|                                           | ABL1  | Substitution  | Nonsynonymous coding | 997P>S               | 12%          | 338                  | 42                    |
|                                           | ASXL1 | Substitution  | Nonsynonymous coding | 371L>M               | 11%          | 412                  | 45                    |
|                                           | GNAQ  | Substitution  | Nonsynonymous coding | 60R>T                | 15%          | 514                  | 76                    |
|                                           | KRAS  | Substitution  | Nonsynonymous coding | 12G>C                | 8%           | 393                  | 31                    |
|                                           | MED12 | Substitution  | Nonsynonymous coding | 1253E>Q              | 8%           | 239                  | 18                    |
|                                           | RET   | Substitution  | Nonsynonymous coding | 417R>H               | 3%           | 116                  | 4                     |
| Primary Tumor                             | KRAS  | Substitution  | Nonsynonymous coding | 12G>C                | 13%          | 457                  | 59                    |

Patient # 6709

| Histologic samples within the same lesion | Gene   | Mutation Type | Consequence                           | Amino Acid (protein) | Mutant reads | Distinct Total Reads | Distinct Mutant Reads |
|-------------------------------------------|--------|---------------|---------------------------------------|----------------------|--------------|----------------------|-----------------------|
| AAH-1                                     | DNMT3A | Substitution  | Nonsynonymous coding                  | 261T>M               | 2%           | 184                  | 4                     |
| AAH-2                                     |        |               | No somatic sequence alterations found |                      |              |                      |                       |
| AAH-3                                     |        |               | No somatic sequence alterations found |                      |              |                      |                       |
| AAH-4                                     | ATM    | Substitution  | Splice site donor                     | NA                   | 7%           | 55                   | 4                     |
|                                           | FBXW7  | Substitution  | Nonsense                              | 224R>X               | 4%           | 139                  | 5                     |
|                                           | FGFR4  | Substitution  | Nonsynonymous coding                  | 356R>H               | 4%           | 105                  | 4                     |
|                                           | MET    | Substitution  | Nonsynonymous coding                  | 965G>S               | 5%           | 86                   | 4                     |
|                                           | ROS1   | Substitution  | Nonsynonymous coding                  | 1601A>D              | 14%          | 96                   | 13                    |
|                                           | TSC2   | Substitution  | Nonsynonymous coding                  | 138E>K               | 3%           | 132                  | 4                     |
| Primary Tumor                             | ARID1A | Substitution  | Nonsynonymous coding                  | 1551R>C              | 2%           | 183                  | 4                     |
|                                           | ATRX   | Substitution  | Nonsynonymous coding                  | 319K>N               | 8%           | 231                  | 19                    |
|                                           | FGFR3  | Substitution  | Nonsynonymous coding                  | 804S>L               | 2%           | 193                  | 4                     |
|                                           | KRAS   | Substitution  | Nonsynonymous coding                  | 12G>D                | 12%          | 367                  | 44                    |
|                                           | NOTCH1 | Substitution  | Nonsynonymous coding                  | 348A>T               | 3%           | 159                  | 4                     |
|                                           | PIK3CA | Substitution  | Nonsynonymous coding                  | 1047R>R              | 19%          | 526                  | 99                    |
|                                           | RET    | Substitution  | Nonsynonymous coding                  | 867E>K               | 4%           | 111                  | 4                     |
|                                           | STK11  | Substitution  | Nonsynonymous coding                  | 397A>V               | 2%           | 170                  | 4                     |
|                                           | TSHR   | Substitution  | Nonsynonymous coding                  | 249S>Y               | 17%          | 525                  | 89                    |

Patient # 4325

| Histologic samples within the same lesion | Gene         | Mutation Type        | Consequence                           | Amino Acid (protein) | Mutant reads | Distinct Total Reads | Distinct Mutant Reads |
|-------------------------------------------|--------------|----------------------|---------------------------------------|----------------------|--------------|----------------------|-----------------------|
| AAH-1                                     | BRAF         | Substitution         | Nonsynonymous coding                  | 469G>A               | 2%           | 347                  | 7                     |
|                                           | MED12        | Substitution         | Nonsynonymous coding                  | 1212Q>R              | 3%           | 366                  | 11                    |
|                                           | PTPN11       | Substitution         | Nonsynonymous coding                  | 419H>Q               | 3%           | 265                  | 7                     |
|                                           | TNFAIP3      | Substitution         | Nonsynonymous coding                  | 129T>K               | 2%           | 773                  | 19                    |
| AAH-2                                     |              |                      | No somatic sequence alterations found |                      |              |                      |                       |
| AAH3                                      | ATRX         | Substitution         | Nonsynonymous coding                  | 929Q>E               | 2%           | 379                  | 8                     |
|                                           | IKZF1        | Substitution         | Nonsynonymous coding                  | 166I>M               | 8%           | 262                  | 22                    |
|                                           | NF1          | Deletion             | Frameshift                            | NA                   | 10%          | 344                  | 35                    |
| AAH-4                                     | ABL1         | Substitution         | Nonsynonymous coding                  | 608R>C               | 3%           | 144                  | 4                     |
|                                           | ARID1B       | Substitution         | Nonsynonymous coding                  | 1835A>T              | 2%           | 191                  | 4                     |
|                                           | EGFR         | Substitution         | Nonsynonymous coding                  | 324R>H               | 2%           | 172                  | 4                     |
|                                           | FGFR2        | Substitution         | Nonsynonymous coding                  | 550N>D               | 4%           | 134                  | 5                     |
|                                           | FLT3         | Substitution         | Nonsynonymous coding                  | 228D>N               | 2%           | 168                  | 4                     |
| PDGFRA                                    | Substitution | Nonsynonymous coding | 279E>K                                | 2%                   | 199          | 4                    |                       |
| AAH5                                      | ARID1A       | Substitution         | Nonsynonymous coding                  | 1593R>W              | 2%           | 230                  | 5                     |
|                                           | ARID1B       | Substitution         | Nonsynonymous coding                  | 165G>A               | 19%          | 42                   | 8                     |
|                                           | ATM          | Substitution         | Nonsynonymous coding                  | 28E>V                | 16%          | 202                  | 32                    |
| Primary Tumor                             | GNA5         | Deletion             | Frameshift                            | NA                   | 6%           | 385                  | 23                    |
|                                           | NRAS         | Substitution         | Nonsynonymous coding                  | 61Q>L                | 7%           | 465                  | 31                    |
|                                           | PDGFRA       | Substitution         | Nonsynonymous coding                  | 478S>P               | 3%           | 645                  | 18                    |
|                                           | PDGFRA       | Substitution         | Nonsynonymous coding                  | 956G>R               | 4%           | 733                  | 27                    |
| Primary Tumor                             | TP53         | Substitution         | Nonsynonymous coding                  | 155T>P               | 4%           | 469                  | 21                    |

Patient # 7074

| Histologic samples within the same lesion | Gene   | Mutation Type | Consequence                           | Amino Acid (protein) | Mutant reads | Distinct Total Reads | Distinct Mutant Reads |
|-------------------------------------------|--------|---------------|---------------------------------------|----------------------|--------------|----------------------|-----------------------|
| AAH-1                                     |        |               | No somatic sequence alterations found |                      |              |                      |                       |
| AAH-2                                     |        |               | No somatic sequence alterations found |                      |              |                      |                       |
| AAH-3                                     | AKT1   | Substitution  | Nonsynonymous coding                  | 58A>V                | 2%           | 175                  | 4                     |
|                                           | RET    | Substitution  | Splice site donor                     | NA                   | 3%           | 144                  | 4                     |
| Primary Tumor                             | KRAS   | Substitution  | Nonsynonymous coding                  | 12G>C                | 21%          | 467                  | 100                   |
|                                           | NOTCH3 | Substitution  | Nonsynonymous coding                  | 588R>C               | 2%           | 191                  | 4                     |
|                                           | PAX5   | Substitution  | Nonsynonymous coding                  | 31R>P                | 16%          | 507                  | 80                    |
|                                           | PTEN   | Substitution  | Nonsynonymous coding                  | 252D>Y               | 42%          | 256                  | 107                   |
|                                           | TP53   | Substitution  | Nonsynonymous coding                  | 342R>P               | 19%          | 346                  | 65                    |
|                                           | TP53   | Substitution  | Nonsynonymous coding                  | 242C>F               | 18%          | 386                  | 70                    |

**Supplementary Table 21.** Summary of all mutations and copy number variations identified in AAH samples. Table lists mutated genes, mutations type, amino acid changes, distinct coverage and percentage of mutant reads identified.



## Adenocarcinoma in Situ

Patient # 9450

| Histologic progression within the same lesion | Gene   | Mutation Type | Consequence          | Amino Acid (protein) | Mutant reads | Distinct Total Reads | Distinct Mutant Reads |
|-----------------------------------------------|--------|---------------|----------------------|----------------------|--------------|----------------------|-----------------------|
| Tumor Zone 1                                  | APC    | Substitution  | Nonsynonymous coding | 1406Q>H              | 6%           | 300                  | 18                    |
|                                               | KIT    | Substitution  | Nonsynonymous coding | 630H>Y               | 13%          | 388                  | 49                    |
|                                               | KRAS   | Substitution  | Nonsynonymous coding | 12G>C                | 10%          | 278                  | 28                    |
|                                               | SF3B1  | Substitution  | Nonsynonymous coding | 700K>E               | 12%          | 350                  | 43                    |
|                                               | TET2   | Substitution  | Nonsynonymous coding | 1045A>D              | 8%           | 414                  | 35                    |
| Tumor Zone 2                                  | APC    | Substitution  | Nonsynonymous coding | 1406Q>H              | 7%           | 305                  | 21                    |
|                                               | KIT    | Substitution  | Nonsynonymous coding | 630H>Y               | 12%          | 373                  | 44                    |
|                                               | KRAS   | Substitution  | Nonsynonymous coding | 12G>C                | 11%          | 331                  | 38                    |
|                                               | SF3B1  | Substitution  | Nonsynonymous coding | 700K>E               | 18%          | 413                  | 74                    |
|                                               | TET2   | Substitution  | Nonsynonymous coding | 1045A>D              | 16%          | 490                  | 78                    |
| Tumor Zone 3                                  | ARID1A | Substitution  | Nonsynonymous coding | 1396G>A              | 6%           | 320                  | 18                    |
|                                               | TP53   | Substitution  | Nonsense             | 136Q>X               | 10%          | 545                  | 52                    |
|                                               | KRAS   | Substitution  | Nonsynonymous coding | 12G>C                | 10%          | 649                  | 63                    |
|                                               | SF3B1  | Substitution  | Nonsynonymous coding | 700K>E               | 9%           | 753                  | 71                    |
|                                               | TET2   | Substitution  | Nonsynonymous coding | 1045A>D              | 4%           | 312                  | 12                    |

Patient # 3983

| Histologic progression within the same lesion | Gene                                  | Mutation Type | Consequence          | Amino Acid (protein) | Mutant reads | Distinct Total Reads | Distinct Mutant Reads |
|-----------------------------------------------|---------------------------------------|---------------|----------------------|----------------------|--------------|----------------------|-----------------------|
| Tumor Zone 1                                  | No somatic sequence alterations found |               |                      |                      |              |                      |                       |
| Tumor Zone 2                                  | No somatic sequence alterations found |               |                      |                      |              |                      |                       |
| Tumor Zone 3                                  | ARID1A                                | Substitution  | Nonsynonymous coding | 1528R>Q              | 3%           | 140                  | 4                     |
|                                               | ERBB4                                 | Substitution  | Nonsynonymous coding | 1134V>M              | 2%           | 240                  | 5                     |
|                                               | IGF1R                                 | Substitution  | Nonsynonymous coding | 283A>T               | 4%           | 108                  | 4                     |

Patient # 0429

| Histologic progression within the same lesion | Gene | Mutation Type | Consequence          | Amino Acid (protein) | Mutant reads | Distinct Total Reads | Distinct Mutant Reads |
|-----------------------------------------------|------|---------------|----------------------|----------------------|--------------|----------------------|-----------------------|
| Tumor Zone 1                                  | EGFR | Substitution  | Nonsynonymous coding | 858L>R               | 19%          | 151                  | 28                    |
| Tumor Zone 2                                  | EGFR | Substitution  | Nonsynonymous coding | 858L>R               | 16%          | 222                  | 35                    |
| Tumor Zone 3                                  | EGFR | Substitution  | Nonsynonymous coding | 858L>R               | 17%          | 169                  | 28                    |

Patient # 3916

| Histologic progression within the same lesion | Gene                                  | Mutation Type | Consequence | Amino Acid (protein) | Mutant reads | Distinct Total Reads | Distinct Mutant Reads |
|-----------------------------------------------|---------------------------------------|---------------|-------------|----------------------|--------------|----------------------|-----------------------|
| Tumor Zone 1                                  | MET                                   | Deletion      | Frameshift  | NA                   | 4%           | 147                  | 6                     |
| Tumor Zone 2                                  | No somatic sequence alterations found |               |             |                      |              |                      |                       |
| Tumor Zone 3                                  | ATM                                   | Substitution  | Nonsense    | 250R>X               | 5%           | 78                   | 4                     |

Patient # 9309

| Histologic progression within the same lesion | Gene  | Mutation Type | Consequence          | Amino Acid (protein) | Mutant reads | Distinct Total Reads | Distinct Mutant Reads |
|-----------------------------------------------|-------|---------------|----------------------|----------------------|--------------|----------------------|-----------------------|
| Tumor Zone 1                                  | ABL1  | Substitution  | Nonsynonymous coding | 1101A>V              | 6%           | 72                   | 4                     |
|                                               | CCND1 | Substitution  | Nonsynonymous coding | 169P>S               | 3%           | 157                  | 4                     |
|                                               | PBRM1 | Substitution  | Nonsense             | 1565W>X              | 4%           | 121                  | 5                     |
|                                               | PBRM1 | Substitution  | Nonsynonymous coding | 160E>K               | 6%           | 67                   | 4                     |
|                                               | TSC2  | Substitution  | Nonsynonymous coding | 354Q>R               | 3%           | 141                  | 4                     |
| Tumor Zone 2                                  | GATA1 | Substitution  | Nonsynonymous coding | 298R>W               | 2%           | 188                  | 4                     |
| Tumor Zone 3                                  | GNAS  | Substitution  | Nonsynonymous coding | 232R>C               | 2%           | 175                  | 4                     |
|                                               | MSH6  | Substitution  | Nonsynonymous coding | 922R>Q               | 4%           | 92                   | 4                     |

Patient # 9309

|              | Gene   | Fold amplification |
|--------------|--------|--------------------|
| Tumor Zone 1 | GATA2  | 4.0                |
|              | FGFR3  | 4.3                |
|              | NOTCH1 | 6.2                |
|              | HRAS   | 5.3                |
|              | CCND1  | 7.0                |
|              | AKT1   | 3.1                |
|              | IDH2   | 3.3                |
|              | ERBB2  | 3.4                |
|              | GNA11  | 4.0                |
| RUNX1        | 3.6    |                    |
| Tumor Zone 2 | FGFR3  | 3.5                |
|              | MYC    | 3.9                |
|              | NOTCH1 | 4.2                |
|              | HRAS   | 4.3                |
|              | CCND1  | 5.1                |
|              | IDH2   | 3.9                |
|              | ERBB2  | 3.5                |
| GNA11        | 3.9    |                    |
| Tumor Zone 3 | GATA2  | 3.0                |
|              | FGFR3  | 3.4                |
|              | MYC    | 3.2                |
|              | NOTCH1 | 3.4                |
|              | HRAS   | 3.7                |
| CCND1        | 5.0    |                    |

**Supplementary Table 22.** Summary of all mutations and copy number variations identified in AIS samples. Table lists mutated genes, mutations type, amino acid changes, distinct coverage and percentage of mutant reads identified.

## Minimally invasive adenocarcinoma

Patient # 2035

| Histologic progression within the same lesion | Gene   | Mutation Type | Consequence          | Amino Acid (protein) | Mutant reads | Distinct Total Reads | Distinct Mutant Reads |
|-----------------------------------------------|--------|---------------|----------------------|----------------------|--------------|----------------------|-----------------------|
| Tumor Zone 1                                  | CTNNB1 | Substitution  | Nonsynonymous coding | 535R>Q               | 3%           | 150                  | 4                     |
|                                               | EGFR   | Deletion      | In-frame deletion    | NA                   | 4%           | 98                   | 4                     |
|                                               | TP53   | Substitution  | Nonsynonymous coding | 245G>S               | 38%          | 100                  | 38                    |
| Tumor Zone 2                                  | EGFR   | Deletion      | In-frame deletion    | NA                   | 3%           | 64                   | 2                     |
|                                               | TP53   | Substitution  | Nonsynonymous coding | 245G>S               | 34%          | 77                   | 26                    |
| Tumor Zone 3                                  | CREBBP | Substitution  | Nonsynonymous coding | 346A>V               | 2%           | 204                  | 5                     |
|                                               | EGFR   | Deletion      | In-frame deletion    | NA                   | 3%           | 134                  | 4                     |
|                                               | TP53   | Substitution  | Nonsynonymous coding | 245G>S               | 46%          | 194                  | 89                    |
| Tumor Zone 4                                  | EGFR   | Deletion      | In-frame deletion    | NA                   | 3%           | 134                  | 4                     |
|                                               | TP53   | Substitution  | Nonsynonymous coding | 245G>S               | 19%          | 197                  | 38                    |

Patient # 1061

| Histologic progression within the same lesion | Gene   | Mutation Type | Consequence          | Amino Acid (protein) | Mutant reads | Distinct Total Reads | Distinct Mutant Reads |
|-----------------------------------------------|--------|---------------|----------------------|----------------------|--------------|----------------------|-----------------------|
| Tumor Zone 1                                  | BRAF   | Substitution  | Nonsynonymous coding | 581N>S               | 3%           | 202                  | 7                     |
| Tumor Zone 2                                  | APC    | Substitution  | Nonsynonymous coding | 1444Q>R              | 2%           | 193                  | 4                     |
|                                               | BRCA2  | Substitution  | Nonsynonymous coding | 1043A>V              | 2%           | 187                  | 4                     |
|                                               | MPL    | Substitution  | Nonsynonymous coding | 594L>W               | 10%          | 220                  | 21                    |
|                                               | PTEN   | Substitution  | Nonsynonymous coding | 301D>N               | 2%           | 230                  | 5                     |
| Tumor Zone 3                                  | APC    | Deletion      | Frameshift           | NA                   | 43%          | 231                  | 99                    |
|                                               | ASXL1  | Substitution  | Nonsynonymous coding | 533A>S               | 39%          | 673                  | 264                   |
|                                               | ATRX   | Substitution  | Nonsynonymous coding | 929Q>E               | 3%           | 190                  | 5                     |
|                                               | NOTCH3 | Substitution  | Nonsynonymous coding | 1700D>Y              | 49%          | 76                   | 37                    |
|                                               | TP53   | Substitution  | Nonsynonymous coding | 204E>D               | 19%          | 605                  | 115                   |
|                                               | TP53   | Substitution  | Nonsynonymous coding | 154G>V               | 55%          | 556                  | 308                   |
| Tumor Zone 4                                  | APC    | Deletion      | Frameshift           | NA                   | 7%           | 260                  | 18                    |
|                                               | ASXL1  | Substitution  | Nonsynonymous coding | 533A>S               | 16%          | 319                  | 50                    |
|                                               | NOTCH3 | Substitution  | Nonsynonymous coding | 1700D>Y              | 19%          | 79                   | 15                    |
|                                               | TP53   | Substitution  | Nonsynonymous coding | 204E>D               | 11%          | 356                  | 40                    |
|                                               | TP53   | Substitution  | Nonsynonymous coding | 154G>V               | 33%          | 340                  | 111                   |

Patient # 6610

| Histologic progression within the same lesion | Gene   | Mutation Type | Consequence          | Amino Acid (protein) | Mutant reads | Distinct Total Reads | Distinct Mutant Reads |
|-----------------------------------------------|--------|---------------|----------------------|----------------------|--------------|----------------------|-----------------------|
| Tumor Zone 1                                  | EGFR   | Insertion     | In-frame insertion   | NA                   | 3%           | 132                  | 4                     |
|                                               | IGF1R  | Substitution  | Nonsynonymous coding | 983A>T               | 2%           | 195                  | 4                     |
|                                               | MED12  | Substitution  | Nonsynonymous coding | 709E>K               | 3%           | 159                  | 4                     |
|                                               | TET2   | Substitution  | Nonsense             | 1050S>X              | 2%           | 234                  | 5                     |
|                                               | TP53   | Substitution  | Nonsynonymous coding | 154G>D               | 2%           | 241                  | 5                     |
| Tumor Zone 2                                  | CCND1  | Substitution  | Nonsynonymous coding | 293V>M               | 3%           | 147                  | 5                     |
|                                               | EGFR   | Insertion     | In-frame insertion   | NA                   | NA           | NA                   | NA                    |
|                                               | FGFR2  | Substitution  | Splice site acceptor | NA                   | 2%           | 174                  | 4                     |
| Tumor Zone 3                                  | EGFR   | Insertion     | In-frame insertion   | NA                   | 3%           | 209                  | 6                     |
| Tumor Zone 4                                  | EGFR   | Insertion     | In-frame insertion   | NA                   | 2%           | 376                  | 8                     |
|                                               | NOTCH1 | Deletion      | In-frame deletion    | NA                   | 4%           | 114                  | 4                     |

Patient # 6610

| Gene  | Folds | Type          |
|-------|-------|---------------|
| CCND1 | 3.1   | Amplification |

Patient # 6992

| Histologic progression within the same lesion | Gene   | Mutation Type | Consequence          | Amino Acid (protein) | Mutant reads | Distinct Total Reads | Distinct Mutant Reads |
|-----------------------------------------------|--------|---------------|----------------------|----------------------|--------------|----------------------|-----------------------|
| Tumor Zone 1                                  | ARID1B | Substitution  | Nonsynonymous coding | 681G>D               | 4%           | 95                   | 4                     |
|                                               | CTNNB1 | Substitution  | Splice site acceptor | NA                   | 4%           | 91                   | 4                     |
|                                               | MED12  | Substitution  | Nonsynonymous coding | 784R>H               | 4%           | 90                   | 4                     |
| Tumor Zone 2                                  | EGFR   | Substitution  | Nonsynonymous coding | 790T>M               | 7%           | 623                  | 44                    |
|                                               | EGFR   | Substitution  | Nonsynonymous coding | 858L>R               | 8%           | 617                  | 49                    |
| Tumor Zone 3                                  | EGFR   | Substitution  | Nonsynonymous coding | 790T>M               | 16%          | 403                  | 64                    |
|                                               | EGFR   | Substitution  | Nonsynonymous coding | 858L>R               | 17%          | 327                  | 56                    |
| Tumor Zone 4                                  | EGFR   | Substitution  | Nonsynonymous coding | 790T>M               | 18%          | 483                  | 89                    |
|                                               | EGFR   | Substitution  | Nonsynonymous coding | 858L>R               | 15%          | 515                  | 76                    |

Patient # 4845

| Histologic progression within the same lesion | Gene | Mutation Type | Consequence          | Amino Acid (protein) | Mutant reads | Distinct Total Reads | Distinct Mutant Reads |
|-----------------------------------------------|------|---------------|----------------------|----------------------|--------------|----------------------|-----------------------|
| Tumor Zone 1                                  | ATRX | Substitution  | Nonsynonymous coding | 183K>E               | 37%          | 243                  | 89                    |
|                                               | EGFR | Substitution  | Nonsynonymous coding | 858L>R               | 13%          | 704                  | 95                    |
| Tumor Zone 2                                  | ATRX | Substitution  | Nonsynonymous coding | 183K>E               | 32%          | 208                  | 67                    |
|                                               | EGFR | Substitution  | Nonsynonymous coding | 858L>R               | 17%          | 682                  | 118                   |
| Tumor Zone 3                                  | ATRX | Substitution  | Nonsynonymous coding | 183K>E               | 32%          | 318                  | 101                   |
|                                               | EGFR | Substitution  | Nonsynonymous coding | 858L>R               | 15%          | 668                  | 103                   |
| Tumor Zone 4                                  | ATRX | Substitution  | Nonsynonymous coding | 183K>E               | 35%          | 308                  | 108                   |
|                                               | EGFR | Substitution  | Nonsynonymous coding | 858L>R               | 19%          | 808                  | 154                   |

Patient # 4845

| Gene   | Folds | Type          |
|--------|-------|---------------|
| NOTCH4 | 1.8   | Amplification |

**Supplementary Table 23.** Summary of all mutations and copy number variations identified in MIA samples. Table lists mutated genes, mutations type, amino acid changes, distinct coverage and percentage of mutant reads identified.

| Gene Symbol  | location    | Genomic position              | Amino Acid (protein) | Mutation Type | Sequence Context<br>(Mutation Indicated by "N") | BioRad assay ID |
|--------------|-------------|-------------------------------|----------------------|---------------|-------------------------------------------------|-----------------|
| <b>ATM</b>   | coding area | chr11_107706206-107706206_C_A | p.2455L>M            | Substitution  | GTGCANTGAAA                                     | dHsaMDS70287642 |
| <b>ATRX</b>  | coding area | chrX_76824619-76824619_G_C    | p.929Q>E             | Substitution  | ACTCTNCTCTT                                     | dHsaMDS44557415 |
| <b>BRAF</b>  | coding area | chr7_140127880-140127880_C_A  | p.466G>V             | Substitution  | ATGATNCAGAT                                     | dHsaMDS18827188 |
| <b>BRAF</b>  | coding area | chr7_140127871-140127871_C_G  | p.469G>A             | Substitution  | CTGTTNCAAAT                                     | dHsaMDS70176053 |
| <b>CCND1</b> | coding area | chr11_69175220-69175220_G_A   | p.293V>M             | Substitution  | GGGACNTGGAC                                     | dHsaMDS31524918 |
| <b>ERBB2</b> | coding area | chr17_35119948-35119948_G_A   | p.243G>S             | Substitution  | CTGCCNGCTGC                                     | dHsaMDS83096961 |
| <b>FGFR2</b> | splice site | chr10_123315211-123315211_G_A | NA                   | Substitution  | GCTCTNCAGAA                                     | dHsaMDS95794691 |
| <b>IGF1R</b> | coding area | chr15_97291048-97291048_G_A   | p.983A>T             | Substitution  | TCAGCNCTGCT                                     | dHsaMDS44445826 |
| <b>IKZF1</b> | coding area | chr7_50422576-50422576_A_G    | p.210Y>C             | Substitution  | AAGCTNTAAAC                                     | dHsaMDS57366734 |
| <b>MED12</b> | coding area | chrX_70261620-70261620_G_A    | p.709E>K             | Substitution  | AGAAGNAGGTG                                     | dHsaMDS18715599 |
| <b>NRAS</b>  | coding area | chr1_115060268-115060268_C_G  | p.13G>R              | Substitution  | AACACNACCTG                                     | dHsaMDS31636507 |
| <b>STK11</b> | splice site | chr19_1171505-1171505_G_T     | NA                   | Substitution  | CCGAGNTAGGC                                     | dHsaMDS95906280 |
| <b>TET2</b>  | coding area | chr4_106377697-106377697_C_A  | p.1050S>X            | Substitution  | CAAATNACAGA                                     | dHsaMDS82985372 |
| <b>TP53</b>  | coding area | chr17_7519194-7519194_C_T     | p.154G>D             | Substitution  | GGGTGNCGGGC                                     | dHsaMDS57255145 |

**Supplementary Table 24.** Summary of ddPCR assays used in this study.
